# Supplementary material for: Effect of oral glycine on the clinical, spirometric and inflammatory status in subjects with cystic fibrosis: a pilot randomized trial
Source: Springer Nature journal article supplement (doi:10.1186/s12890-017-0528-x), 2017-12-01

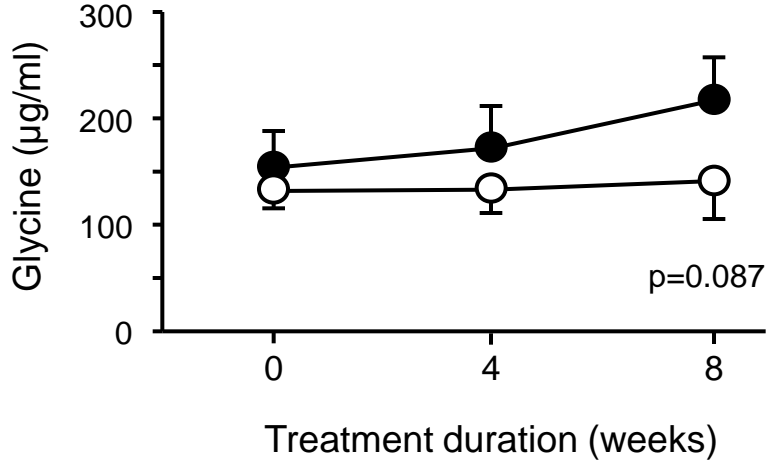

Supplement: MOESM3 [file 15310980]
